# Supplementary material for: Myoinhibitory peptide regulates feeding in the marine annelid Platynereis
Source: PubMed Central journal article supplement (PMC4307165; doi:10.1186/s12983-014-0093-6), 2015-01-07
Supplement: 12983_2014_93_MOESM11_ESM.pdf [file 12983_2014_93_MOESM11_ESM.pdf]

*Platynereis MIP precursor*

5'- CTGCAGCGCCCACTGCATAAGTGCGTGGGACAGTATTTCAACAGACAGCCACTATAA

MIP start MO2

ATATATCGAAGAAAGTTTAATCCTGTTAGTTGGAGATAAGAGGGAGAGAAGGAACTAG

TGTTTGGAACAACCTCTTTATAGGAAACAAGGAACACACAAAGAAGCAACAAGGAA

MIP start MO1

GAAAAGGAAAGAATATTAATAACAACCAAGGGCCCTAGCAGTCCA**ATG**GATCGCGTCA

M D R V

**CTATCA**

**CTATCA**CCTGCTTCTCCCTCTGTCTGGCGTCA... -3'

T I T C F S L C L A S
